# Supplementary material for: Highly selective direct azidation of alcohols over a heterogeneous povidone–phosphotungstic solid acid catalyst
Source: Royal Society of Chemistry journal article supplement (doi:10.1039/c6nj02500e), 2016-01-01

## Highly Selective Direct Azidation of Alcohols over Heterogeneous Povidone – Phosphotungstic Solid Acid Catalyst

*Sumit B. Kamble, Sagar B. More, Chandrashekhar V. Rode\**

Chemical Engineering and Process Development Division,  
CSIR-National Chemical Laboratory, India, Pune-411008.

*Email: [cv.rode@ncl.res.in](mailto:cv.rode@ncl.res.in)*

### Supporting Information for New Journal OF Chemistry

#### Contents

Experimental procedure for synthesis of alcohols, S1

XRD of fresh and recovered PVP-PWA (3:1), S2

Spectroscopic data of all the compounds, S3-S7

<sup>1</sup>H and <sup>13</sup>C-NMR spectra of the products, S8-S25

#### Experimental procedure for the synthesis of alcohols

To the ice cold solution of ketone (10 mmol) in methanol (20 mL), sodium borohydride (5 mmol) was slowly added under stirring. Then, the mixture was further stirred for 1 h at 0 °C followed by 1 h at room temperature. After completion of the reaction monitored by TLC, mixture was extracted with ethyl acetate and washed with water. Evaporation of the ethyl acetate gave alcohol up to 95-99% yields.

### XRD of fresh and recovered PVP-PWA (3:1)

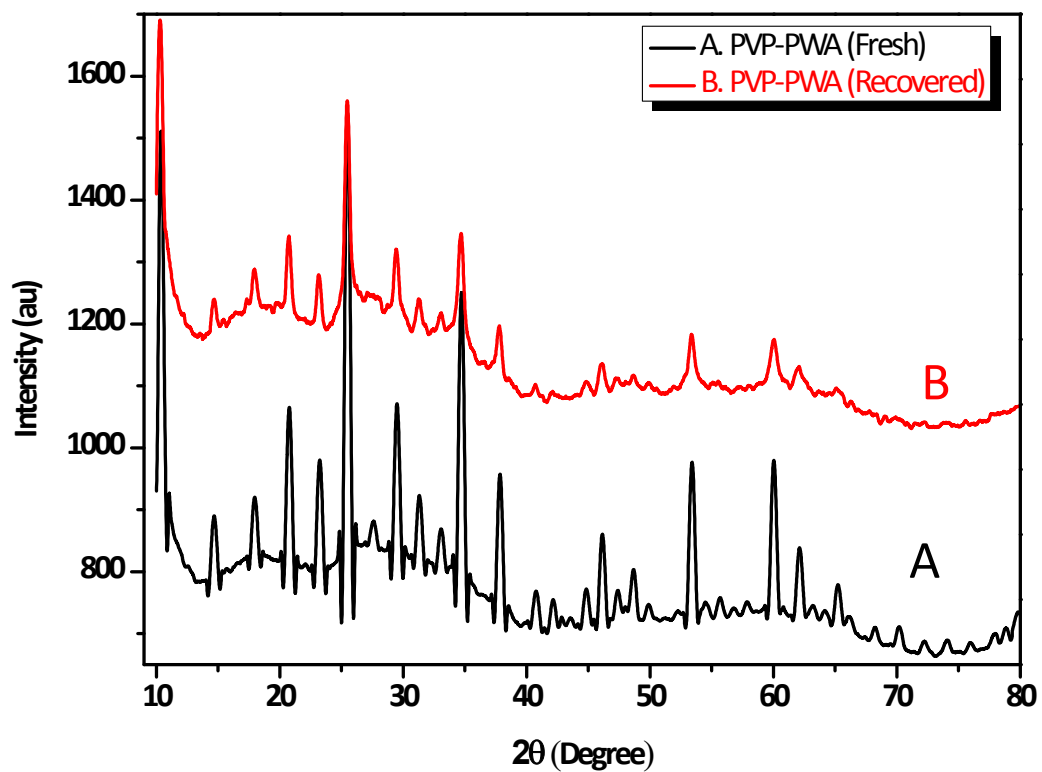

Fig. S1 XRD of A. Fresh and B. Recovered PVP-PWA (3:1)

## Spectroscopic data of all the compounds

All the compounds were confirmed using reported literature.<sup>11-15, 21-24</sup>

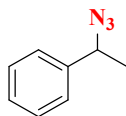

**(1-azidoethyl)benzene**, Table 3, Entry 1.

**FT-IR** ( $\nu$  max): 2926, 2103, 1727, 1601, 1494, 1452, 1372, 1243, 1066, 1066, 762, 737, 700  $\text{cm}^{-1}$ . **<sup>1</sup>H NMR** (CHLOROFORM-d, 200MHz):  $\delta$  = 7.28 - 7.44 (m, 5 H), 5.89 (q,  $J=6.6$  Hz, 1 H), 1.55 ppm (d,  $J=6.6$  Hz, 3 H). **<sup>13</sup>C NMR** (CHLOROFORM-d, 50MHz):  $\delta$  = 141.6, 128.5, 127.8, 126.1, 72.3, 22.2 ppm.

---

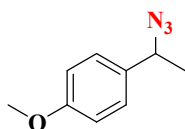

**1-(1-azidoethyl)-4-methoxybenzene**, Table 3, Entry 2.

**FT-IR** ( $\nu$  max): 2978, 2935, 2837, 2098, 1611, 1585, 1513, 1463, 1376, 1340, 1304, 1285, 1243, 1176, 1120, 1061, 1032, 991, 830, 810, 747, 650, 628  $\text{cm}^{-1}$ . **<sup>1</sup>H NMR** (CHLOROFORM-d, 200MHz):  $\delta$  = 7.27 (d,  $J=8.7$  Hz, 2 H), 6.92 (d,  $J=8.8$  Hz, 2 H), 4.58 (q,  $J=6.9$  Hz, 1 H), 3.83 (s, 3 H), 1.52 ppm (d,  $J=6.8$  Hz, 3 H). **<sup>13</sup>C NMR** (CHLOROFORM-d, 50MHz):  $\delta$  = 159.4, 132.9, 127.7, 114.1, 77.7, 76.4, 60.7, 55.3, 21.5 ppm.

---

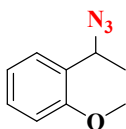

**1-(1-azidoethyl)-2-methoxybenzene**, Table 3, Entry 3.

**FT-IR** ( $\nu$  max): 2092, 1492, 1463, 1438, 1286, 1242, 1061, 1047, 1028, 751  $\text{cm}^{-1}$ . **<sup>1</sup>H NMR** (CHLOROFORM-d, 200MHz):  $\delta$  = 7.24 - 7.41 (m, 2 H), 6.88 - 7.06 (m, 2 H), 5.08 (q,  $J=6.8$  Hz, 1 H), 3.87 (s, 3 H), 1.51 ppm (d,  $J=6.8$  Hz, 3 H). **<sup>13</sup>C NMR** (CHLOROFORM-d, 50MHz):  $\delta$  = 156.4, 129.1, 128.9, 126.5, 120.7, 110.5, 55.3, 54.9, 20.1 ppm.

---

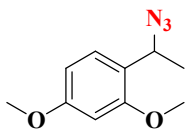

**1-(1-azidoethyl)-2,4-dimethoxybenzene**, Table 3, Entry 4.

**FT-IR** ( $\nu$  max): 2930, 2790, 2089, 1589, 1512, 1461, 1420, 1350, 1299, 1245, 1220, 1159, 1135, 1100, 1050, 1012, 920, 860, 802, 699  $\text{cm}^{-1}$ .  **$^1\text{H NMR}$**  (CHLOROFORM- $d$ , 200MHz):  $\delta$  = 6.86 (s, 3 H), 4.57 (q,  $J=6.8$  Hz, 1 H), 3.88 (s, 3 H), 3.91 (s, 3 H), 1.52 ppm (d,  $J=6.8$  Hz, 3 H).  **$^{13}\text{C NMR}$**  (CHLOROFORM- $d$ , 50MHz):  $\delta$  = 149.1, 148.8, 133.2, 118.6, 110.9, 109.3, 60.9, 55.8, 21.5 ppm.

---

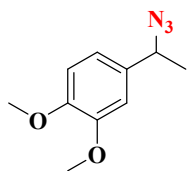

**4-(1-azidoethyl)-1,2-dimethoxybenzene**, Table 3, Entry 5.

**FT-IR** ( $\nu$  max): 2936, 2836, 2105, 1605, 1592, 1515, 1463, 1419, 1375, 1353, 1310, 1256, 1235, 1162, 1141, 1102, 1065, 1025, 914, 855, 808, 765  $\text{cm}^{-1}$ .  **$^1\text{H NMR}$**  (CHLOROFORM- $d$ , 200MHz):  $\delta$  = 6.87 (s, 3 H), 4.58 (d,  $J=6.8$  Hz, 1 H), 3.89 (s, 3 H), 3.92 (s, 3 H), 1.53 ppm (d,  $J=6.8$  Hz, 3 H).  **$^{13}\text{C NMR}$**  (CHLOROFORM- $d$ , 50MHz):  $\delta$  = 149.1, 148.8, 133.2, 118.6, 110.9, 109.3, 60.9, 55.8, 21.5 ppm.

---

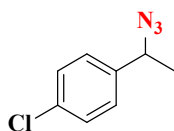

**1-(1-azidoethyl)-4-chlorobenzene**, Table 3, Entry 6.

**IR** ( $\nu$  max): 2946, 2099, 1497, 1451, 1369, 1230, 1045, 1059, 752  $\text{cm}^{-1}$ .  **$^1\text{H NMR}$**  (CHLOROFORM- $d$ , 200MHz):  $\delta$  = 7.45 - 7.58 (m,  $J=8.5$  Hz, 2 H), 7.12 - 7.26 (m,  $J=8.5$  Hz, 2 H), 4.60 (q,  $J=6.9$  Hz, 1 H), 1.52 ppm (d,  $J=6.8$  Hz, 3 H).  **$^{13}\text{C NMR}$**  (CHLOROFORM- $d$ , 50MHz):  $\delta$  = 139.4, 133.8, 128.9, 127.7, 60.3, 21.6 ppm.

---

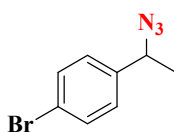

**1-(1-azidoethyl)-4-bromobenzene**, Table 3, Entry 7.

**IR** ( $\nu$  max): 2936, 2101, 1605, 1489, 1377, 1222, 1052, 761, 730  $\text{cm}^{-1}$ .  **$^1\text{H NMR}$**  (CHLOROFORM- $d$ , 200MHz):  $\delta$  = 7.23 - 7.41 (m, 5 H), 4.61 (q,  $J=6.7$  Hz, 1 H), 1.52 ppm (d,  $J=6.8$  Hz, 3 H).  **$^{13}\text{C NMR}$**  (CHLOROFORM- $d$ , 50MHz):  $\delta$  = 139.6, 134.1, 129.2, 128.0, 77.9, 76.6, 60.6, 21.8 ppm.

---

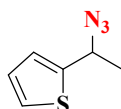

**2-(1-azidoethyl)thiophene**, Table 3, Entry 8.

IR ( $\nu$  max): 2977, 2104, 1453, 1377, 1264, 1235, 1044, 895, 850, 808, 734, 702  $\text{cm}^{-1}$ .  $^1\text{H NMR}$  (CHLOROFORM-*d*, 200MHz):  $\delta$  = 7.30 (dd,  $J=4.9, 1.5$  Hz, 1 H), 6.98 - 7.07 (m, 2 H), 4.84 (q,  $J=6.8$  Hz, 1 H), 1.64 ppm (d,  $J=6.8$  Hz, 3 H).  $^{13}\text{C NMR}$  (CHLOROFORM-*d*, 50MHz):  $\delta$  = 143.8, 126.7, 125.2, 124.8, 56.4, 21.7 ppm.

---

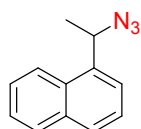

**1-(1-azidoethyl)naphthalene**, Table 3, Entry 9.

**FT-IR** ( $\nu$  max): 3056, 2978, 2097, 1601, 1508, 1449, 1377, 1305, 1242, 1176, 1143, 1127, 1058, 1018, 988, 950, 894, 817, 770, 672, 619  $\text{cm}^{-1}$ .  $^1\text{H NMR}$  (CHLOROFORM-*d*, 200MHz):  $\delta$  = 7.73 - 8.00 (m, 4 H), 7.40 - 7.60 (m, 3 H), 4.81 (q,  $J=6.8$  Hz, 1 H), 1.64 ppm (d,  $J=6.8$  Hz, 3 H).  $^{13}\text{C NMR}$  (CHLOROFORM-*d*, 50MHz):  $\delta$  = 138.2, 133.2, 133.1, 128.7, 128.0, 127.7, 126.4, 126.2, 125.3, 124.2, 61.3, 21.5 ppm.

---

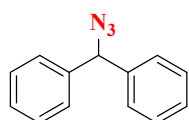

**(Azidomethylene) dibenzene**, Table 3, Entry 10.

**FT-IR** ( $\nu$  max): 3063, 3030, 2094, 1953, 1809, 1601, 1493, 1452, 1237, 1181, 1157, 1078, 1030, 1002, 940, 909, 870, 758, 741, 695, 673, 640, 617  $\text{cm}^{-1}$ .  $^1\text{H NMR}$  (200 MHz, CHLOROFORM-*d*)  $\delta$  = ppm 5.73 (s, 1 H) 7.28 - 7.40 (m, 10 H).  $^{13}\text{C NMR}$  (CHLOROFORM-*d*, 50MHz):  $\delta$  = 139.5, 128.7, 128.0, 127.4, 68.5 ppm.

---

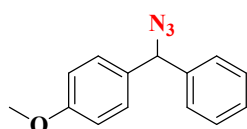

**1-(azido (phenyl) methyl)-4-methoxybenzene**, Table 3, Entry 11.

**FT-IR** ( $\nu$  max): 2976, 2838, 2091, 1601, 1588, 1492, 1464, 1438, 1372, 1346, 1286, 1242, 1194, 1173, 1162, 1121, 1062, 1047, 1028, 993, 935, 842, 803, 751, 691, 647  $\text{cm}^{-1}$ .  $^1\text{H NMR}$  (CHLOROFORM-*d*, 200MHz):  $\delta$  = 7.34 (d,  $J=2.4$  Hz, 5 H), 7.24 (d,  $J=8.8$  Hz, 2 H), 6.90 (d,  $J=8.7$  Hz, 2 H), 5.69 (s, 1 H), 3.82 ppm (s, 3 H).  $^{13}\text{C NMR}$  (CHLOROFORM-*d*, 50MHz):  $\delta$  = 128.8, 128.7, 128.0, 127.3, 114.1, 68.1, 55.3 ppm.

---

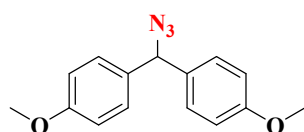

**4,4'-(azidomethylene)bis(methoxybenzene)**, Table 3, Entry 12.

**FT-IR** ( $\nu$  max): 3001, 2956, 2836, 2094, 1609, 1584, 1509, 1462, 1441, 1421, 1303, 1242, 1172, 1111, 1031, 943, 881, 826, 810, 778, 729, 706, 664, 625  $\text{cm}^{-1}$ .  **$^1\text{H NMR}$**  (CHLOROFORM-d, 200MHz):  $\delta$  = 7.23 (d,  $J=8.6$  Hz, 4 H), 6.86 - 6.94 (m, 4 H), 5.65 (s, 1 H), 3.81 ppm (s, 6 H).  **$^{13}\text{C NMR}$**  (CHLOROFORM-d, 50MHz):  $\delta$  = 159.2, 131.9, 128.5, 113.9, 67.5, 55.2 ppm.

---

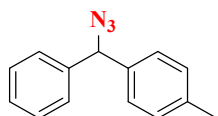

**1-(azido(phenyl)methyl)-4-methylbenzene**, Table 3, Entry 13.

**FT-IR** ( $\nu$  max): 3027, 2922, 2096, 1512, 1493, 1451, 1241, 1176, 1111, 1079, 1057, 1029, 1020, 915, 875, 842, 797, 779, 731, 719, 696, 667, 640, 622  $\text{cm}^{-1}$ .  **$^1\text{H NMR}$**  (CHLOROFORM-d, 200MHz):  $\delta$  = 7.28 - 7.45 (m, 5 H), 7.12 - 7.26 (m, 4 H), 5.70 (s, 1 H), 2.36 ppm (s, 3 H).  **$^{13}\text{C NMR}$**  (CHLOROFORM-d, 50MHz):  $\delta$  = 142.5, 139.8, 139.3, 129.4, 129.0, 128.6, 128.3, 127.9, 127.3, 127.3, 68.3, 21.1 ppm.

---

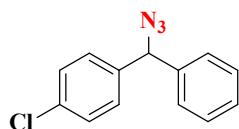

**1-(azido(phenyl)methyl)-4-chlorobenzene**, Table 3, Entry 14.

**FT-IR** ( $\nu$  max): 3030, 2096, 1599, 1490, 1453, 1407, 1239, 1179, 1090, 1030, 1015, 949, 913, 872, 794, 752, 717, 698, 657, 630  $\text{cm}^{-1}$ .  **$^1\text{H NMR}$**  (CHLOROFORM-d, 400MHz):  $\delta$  = 7.27 - 7.41 (m, 8 H), 7.24 - 7.27 (m, 1 H), 5.70 ppm (s, 1 H).  **$^{13}\text{C NMR}$**  (CHLOROFORM-d, 50MHz):  $\delta$  = 165.0, 160.1, 139.6, 135.7, 129.4, 129.2, 129.0, 128.7, 128.4, 127.5, 116.0, 115.6, 68.0 ppm.

---

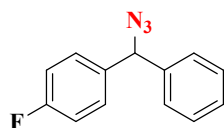

**1-(azido(phenyl)methyl)-4-fluorobenzene**, Table 3, Entry 15.

**FT-IR** ( $\nu$  max): 2096, 1603, 1507, 1494, 1453, 1280, 1223, 1181, 1157, 1097, 1077, 1057, 1028, 1015, 876, 849, 813, 792, 737, 720, 696, 669, 638, 616  $\text{cm}^{-1}$ .  **$^1\text{H NMR}$**  (CHLOROFORM-d, 200MHz):  $\delta$  = 7.28 - 7.44 (m, 6 H), 7.23 - 7.26 (m, 1 H), 7.04 (t,  $J=8.7$  Hz, 2 H), 5.70 ppm (s, 1 H).  **$^{13}\text{C NMR}$**  (CHLOROFORM-d, 50MHz):  $\delta$  = 164.8, 159.9, 139.4, 129.2, 129.0, 128.8, 128.2, 127.3, 115.8, 115.4, 67.8 ppm.

---

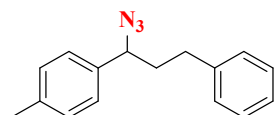

**1-(1-azido-3-phenylpropyl)-4-methylbenzene**, Table 3, Entry 16.

**FT-IR** ( $\nu$  max): 3026, 2923, 2092, 1603, 1514, 1496, 1454, 1306, 1242, 1182, 1113, 1082, 1030, 1019, 908, 882, 815, 772, 748, 721, 698, 637  $\text{cm}^{-1}$ .  **$^1\text{H NMR}$**  (CHLOROFORM-d, 200MHz):  $\delta$  = 7.14 - 7.36 (m, 9 H), 4.37 (t,  $J=7.2$  Hz, 1 H), 2.61 - 2.76 (m, 2 H), 2.37 (s, 3 H), 2.00 - 2.27 ppm (m, 3 H).  **$^{13}\text{C NMR}$**  (CHLOROFORM-d, 50MHz):  $\delta$  = 140.9, 138.1, 136.3, 129.5, 128.4, 126.9, 126.0, 65.2, 37.5, 32.3, 21.1 ppm.

---

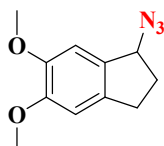

**1-azido-5,6-dimethoxy-2,3-dihydro-1H-indene**, Table 3, Entry 17.

**FT-IR** ( $\nu$  max): 2937, 2086, 1606, 1503, 1464, 1454, 1413, 1338, 1308, 1257, 1220, 1187, 1167, 1089, 1036, 1008, 980, 923, 890, 850, 801, 773, 759, 654  $\text{cm}^{-1}$ .  **$^1\text{H NMR}$**  (CHLOROFORM-d, 200MHz):  $\delta$  = 6.90 (s, 1 H), 6.80 (s, 1 H), 4.82 (dd,  $J=7.1, 4.3$  Hz, 1 H), 3.89 (s, 3 H), 3.90 (s, 3 H), 2.72 - 3.16 (m, 2 H), 2.38 - 2.61 (m, 1 H), 2.06 - 2.28 ppm (m, 1 H).  **$^{13}\text{C NMR}$**  (CHLOROFORM-d, 50MHz):  $\delta$  = 150.0, 148.5, 135.8, 132.2, 107.5, 107.2, 77.8, 77.1, 76.5, 66.5, 56.1, 56.0, 32.9, 30.5 ppm.

---

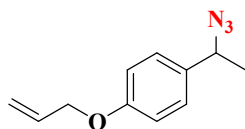

**1-(allyloxy)-4-(1-azidoethyl)benzene**, Table 3, Entry 18.

**FT-IR** ( $\nu$  max): 2967, 2925, 2102, 1609, 1510, 1455, 1373, 1237, 1175, 1104, 1022, 996, 928, 831, 732, 700  $\text{cm}^{-1}$ .  **$^1\text{H NMR}$**  (CHLOROFORM-d, 200MHz):  $\delta$  = 7.21 - 7.30 (m, 2 H), 6.85 - 6.99 (m, 2 H), 5.96 - 6.18 (m, 1 H), 5.23 - 5.51 (m, 2 H), 4.47 - 4.65 (m, 3 H), 1.52 ppm (d,  $J=6.8$  Hz, 3 H).  **$^{13}\text{C NMR}$**  (CHLOROFORM-d, 50MHz):  $\delta$  = 158.4, 133.1, 133.0, 127.6, 117.7, 114.8, 68.8, 60.6, 21.4 ppm.

---

## $^1\text{H}$ and $^{13}\text{C}$ NMR data of the compounds

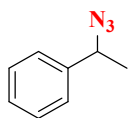

(1-azidoethyl)benzene, Table3, Entry 1.

### $^1\text{H}$ NMR

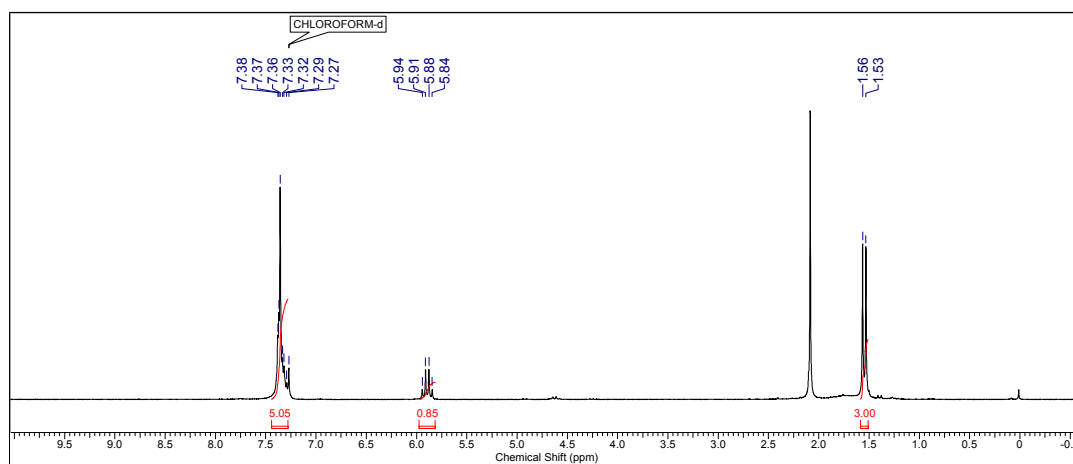

### $^{13}\text{C}$ NMR

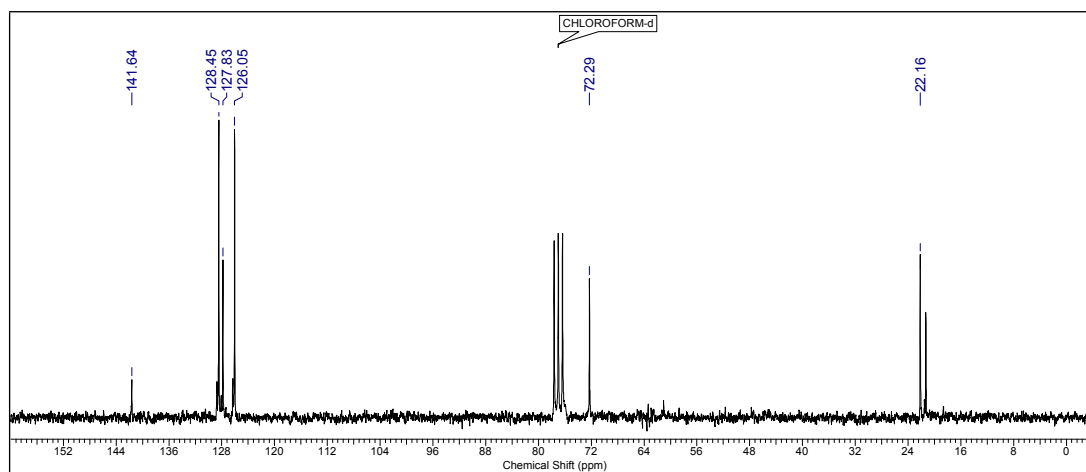



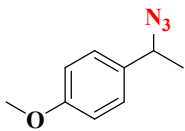

1-(1-azidoethyl)-4-methoxybenzene Table 3, Entry 2.

### <sup>1</sup>H NMR

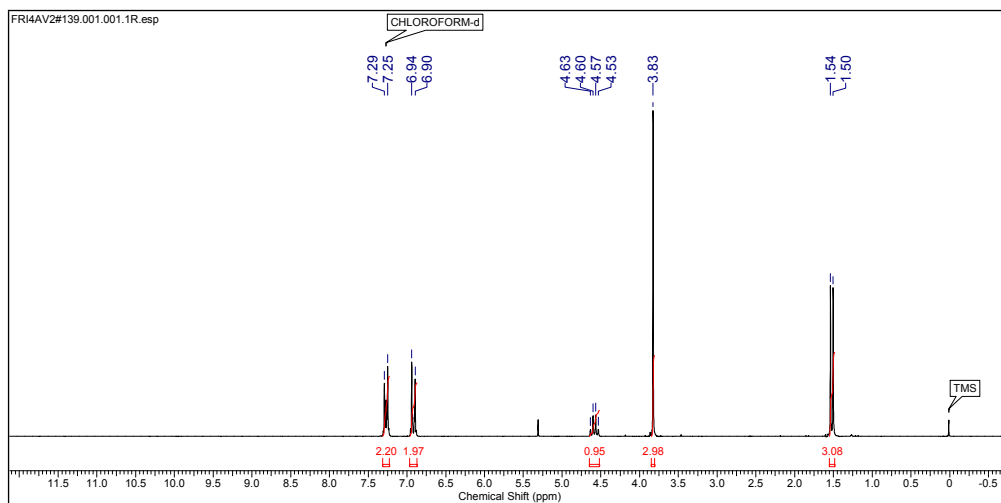

### <sup>13</sup>C NMR

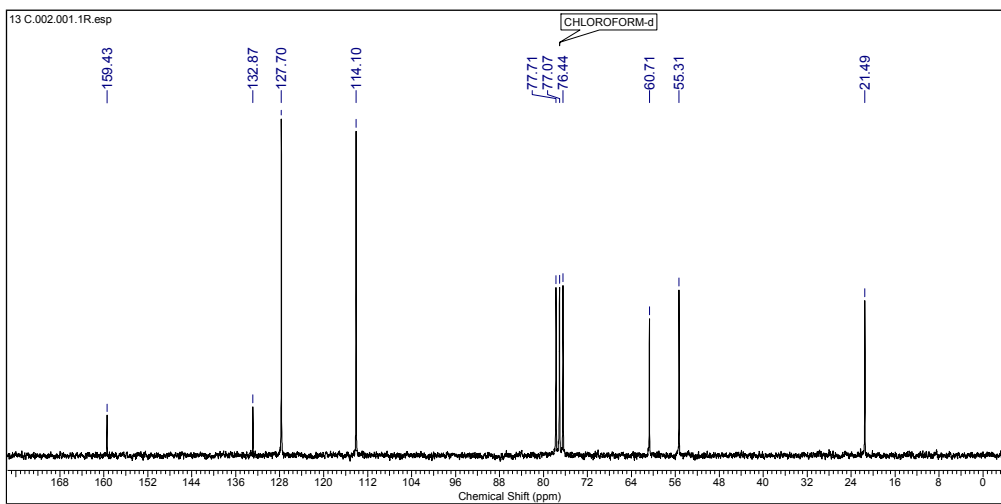

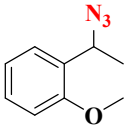

1-(1-azidoethyl)-2-methoxybenzene, Table 3, Entry 3.

### <sup>1</sup>H NMR

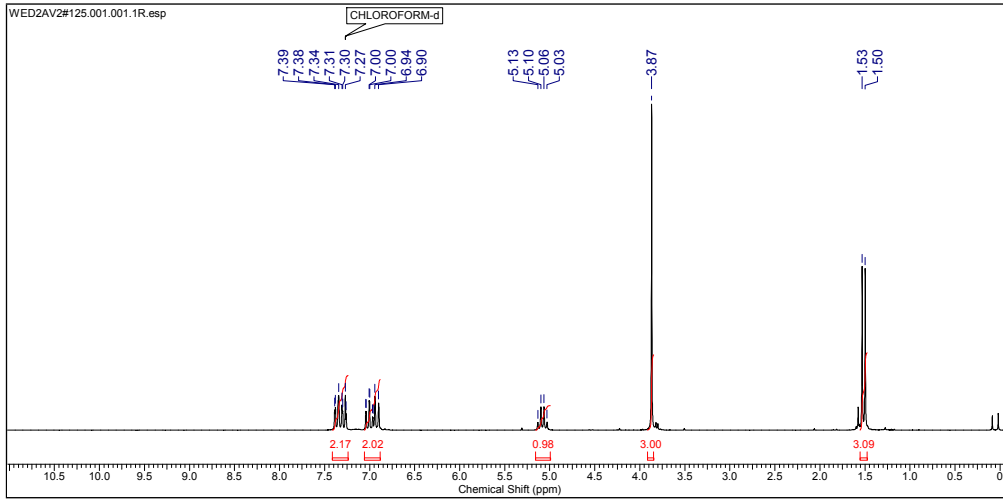

### <sup>13</sup>C NMR

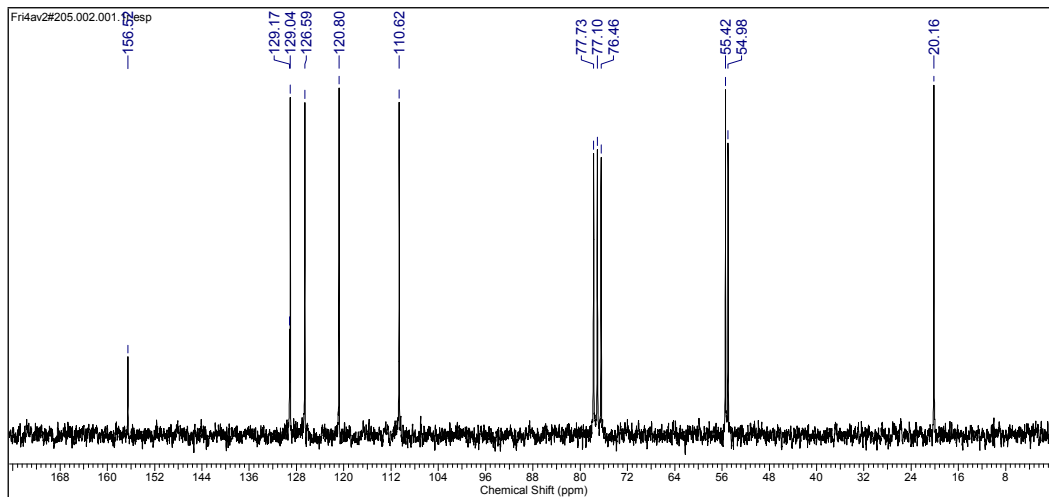

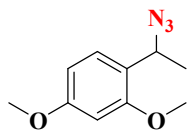

*1-(1-azidoethyl)-2,4-dimethoxybenzene*, Table 3, Entry 4.

### <sup>1</sup>H NMR

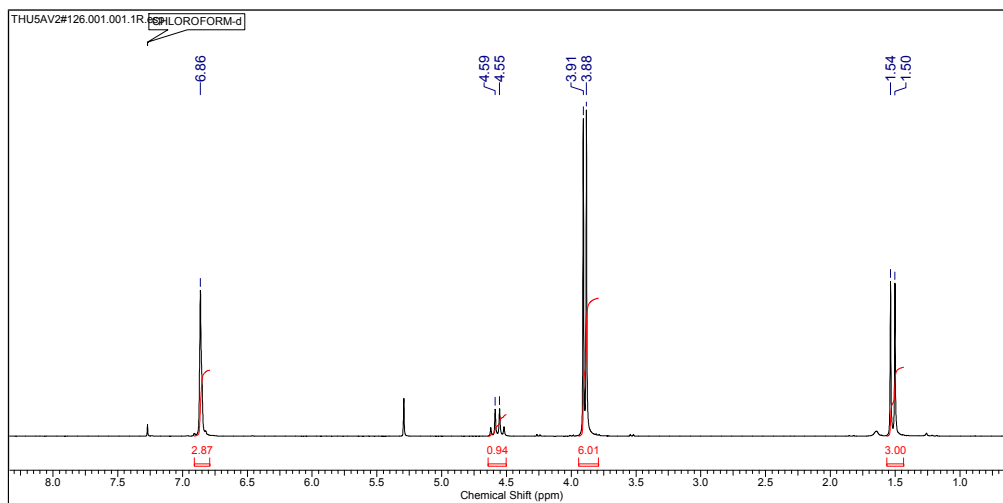

### <sup>13</sup>C NMR

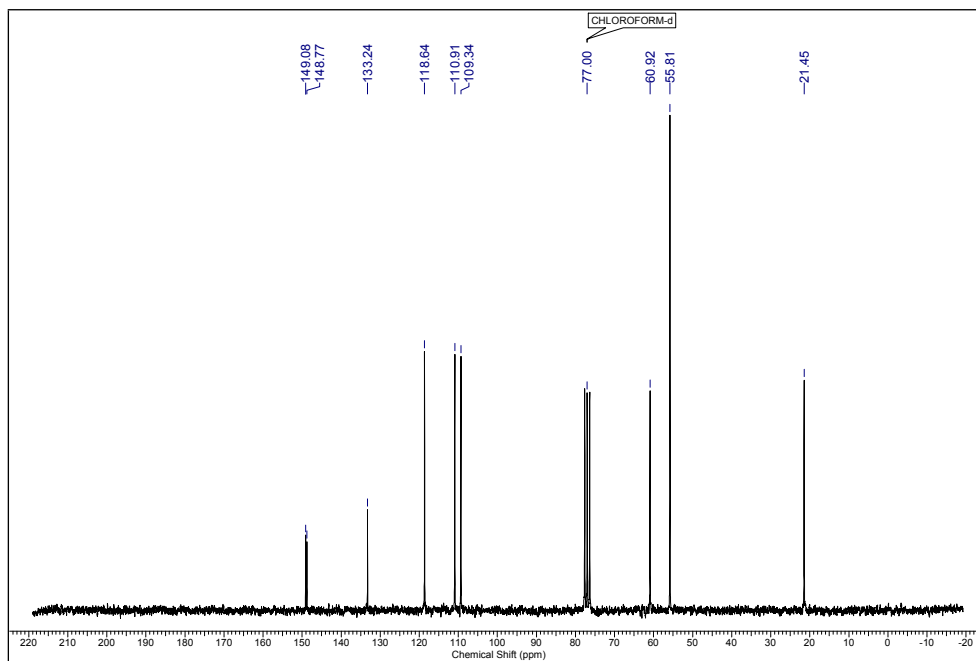

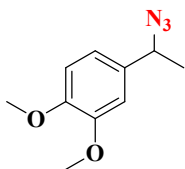

4-(1-azidoethyl)-1,2-dimethoxybenzene, Table 3, Entry 5.

### <sup>1</sup>H NMR

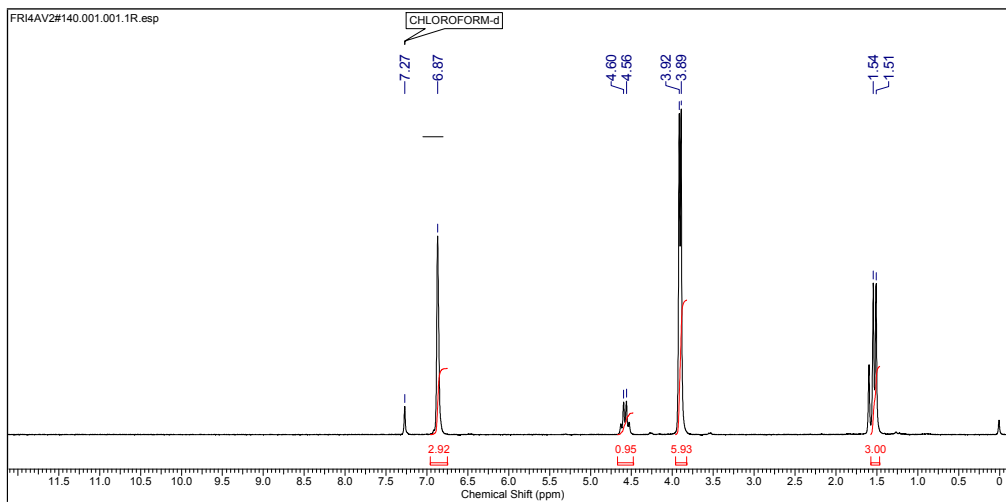

### <sup>13</sup>C NMR

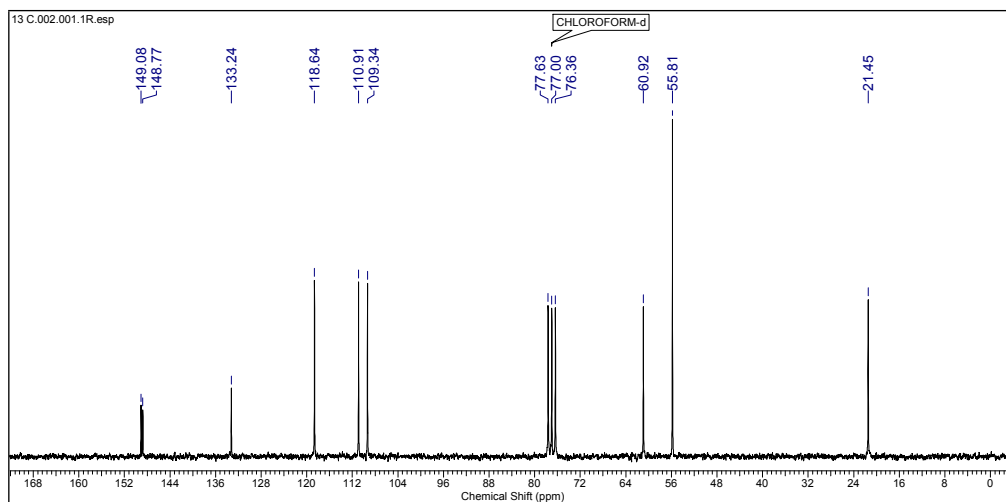

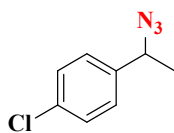

*1-(1-azidoethyl)-4-chlorobenzene*, Table 3, Entry 6.

### <sup>1</sup>H NMR

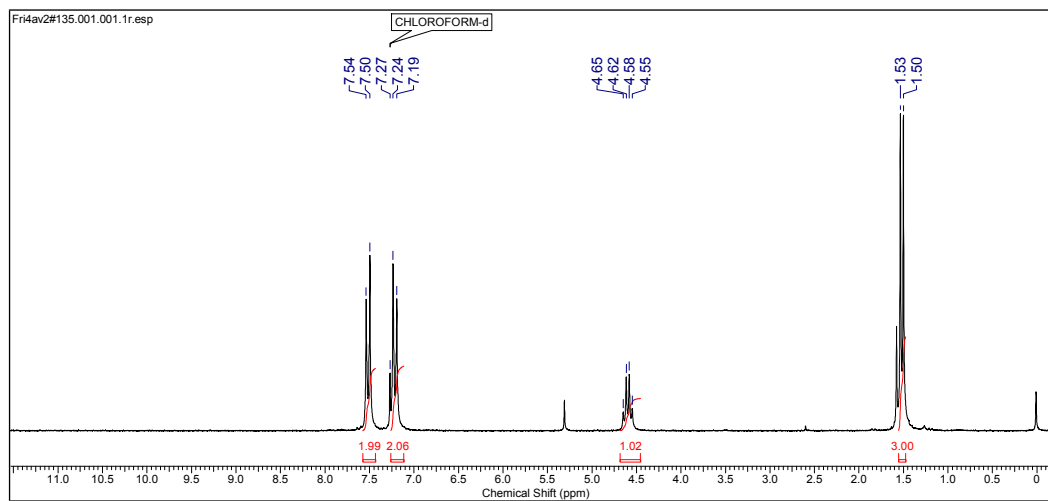

### <sup>13</sup>C NMR

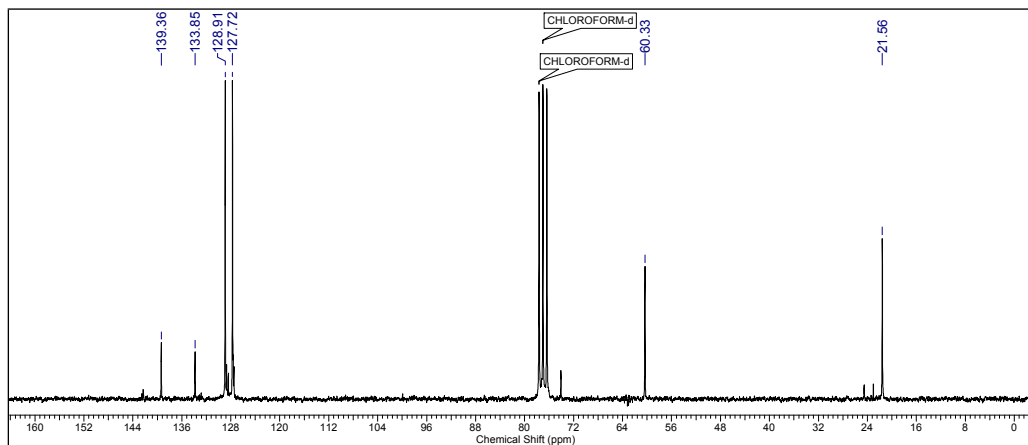

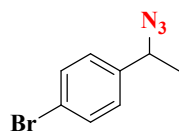

1-(1-azidoethyl)-4-bromobenzene, Table 3, Entry 7.

### $^1\text{H}$ NMR

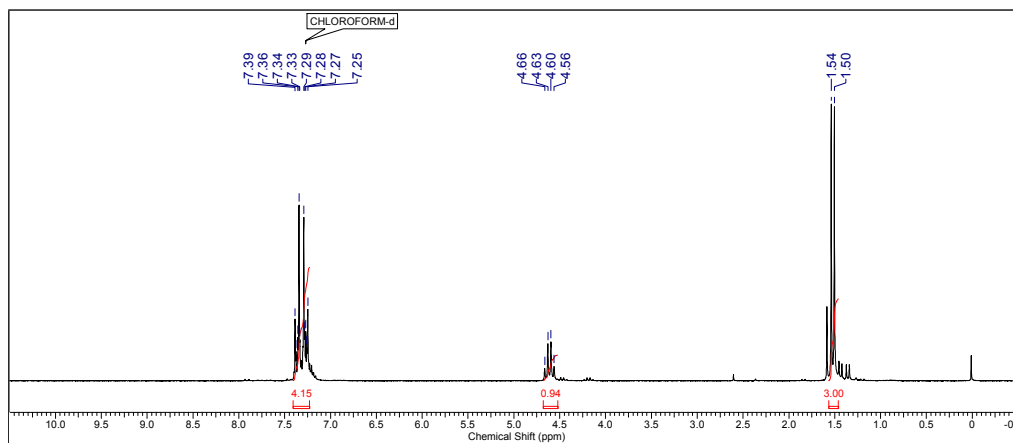

### $^{13}\text{C}$ NMR

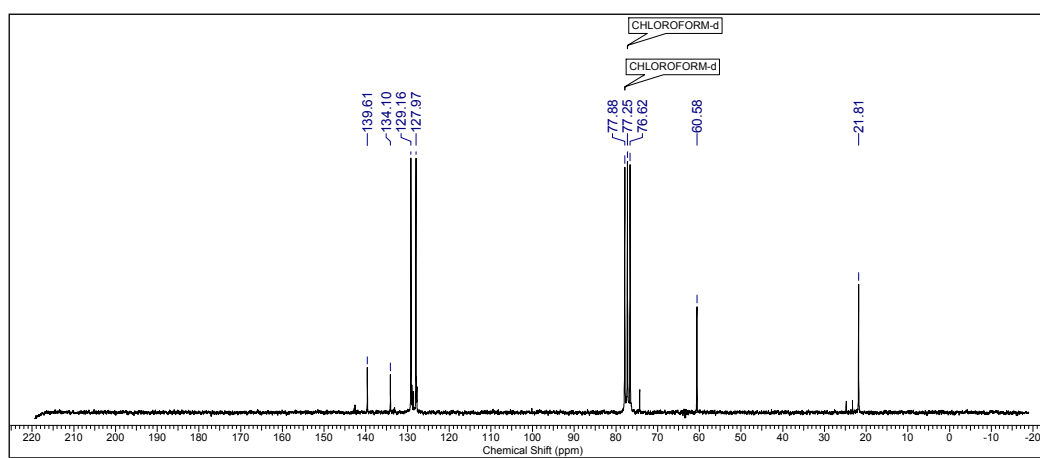

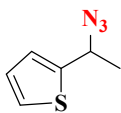

2-(1-azidoethyl)thiophene, Table 3, Entry 8.

<sup>1</sup>H NMR

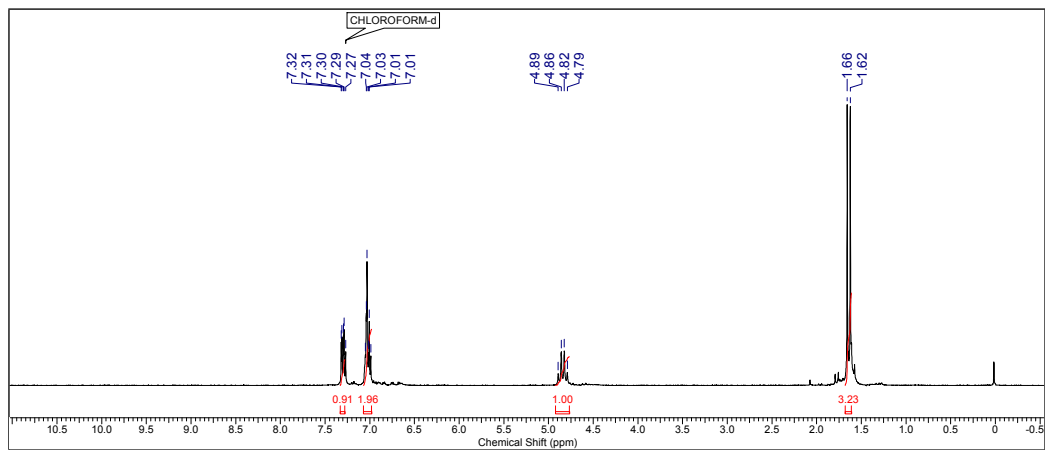

<sup>13</sup>C NMR

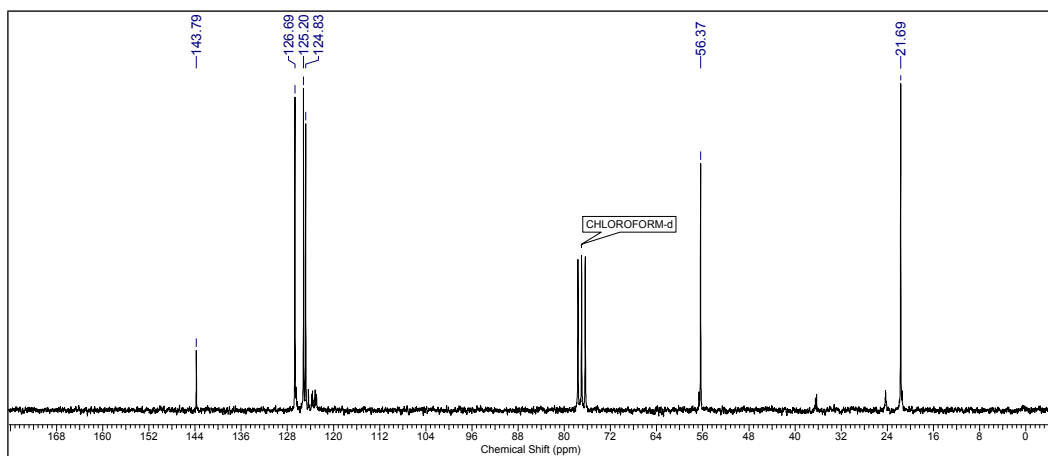

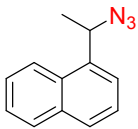

1-(1-azidoethyl)naphthalene, Table 3, Entry 9.

<sup>1</sup>H NMR

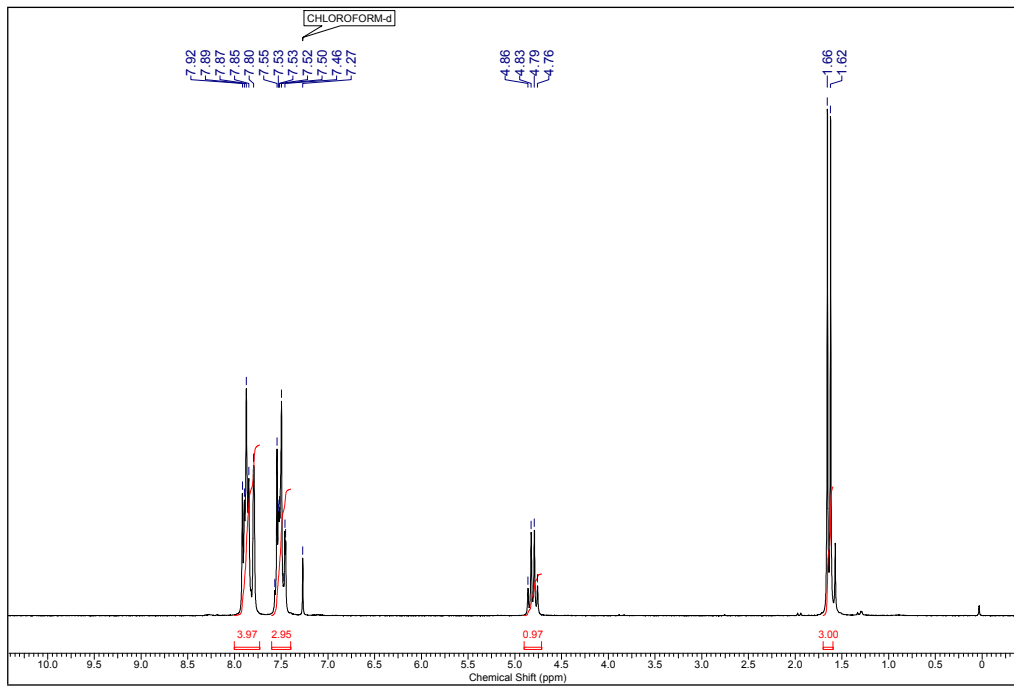

<sup>13</sup>C NMR

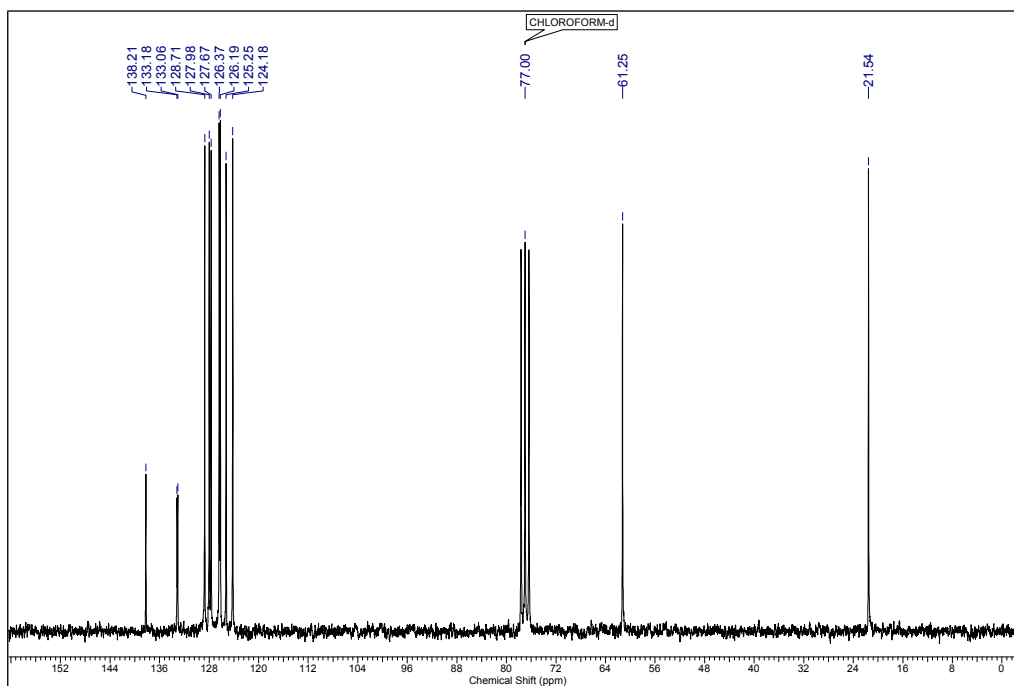



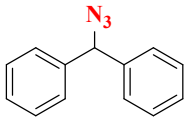

(Azidomethylene) dibenzene, Table 3, Entry 10.

### $^1\text{H}$ NMR

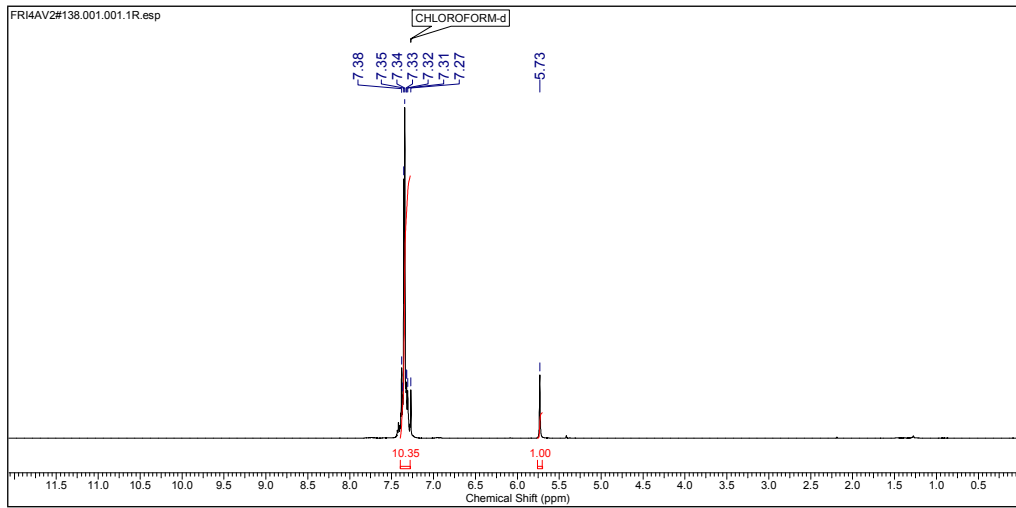

### $^{13}\text{C}$ NMR

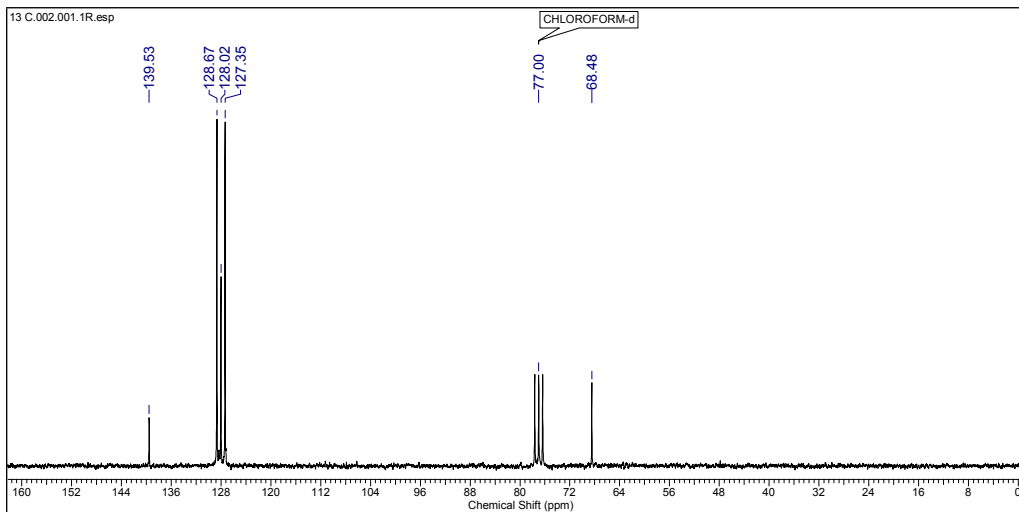

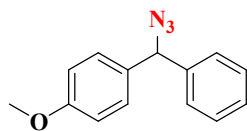

1-(azido (phenyl) methyl)-4-methoxybenzene, Table 3, Entry 11.

### <sup>1</sup>H NMR

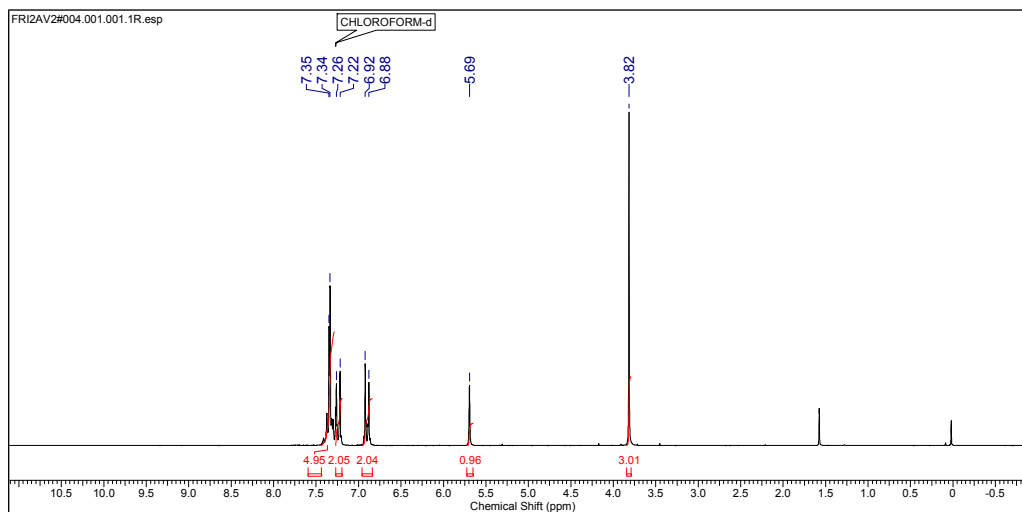

### <sup>13</sup>C NMR

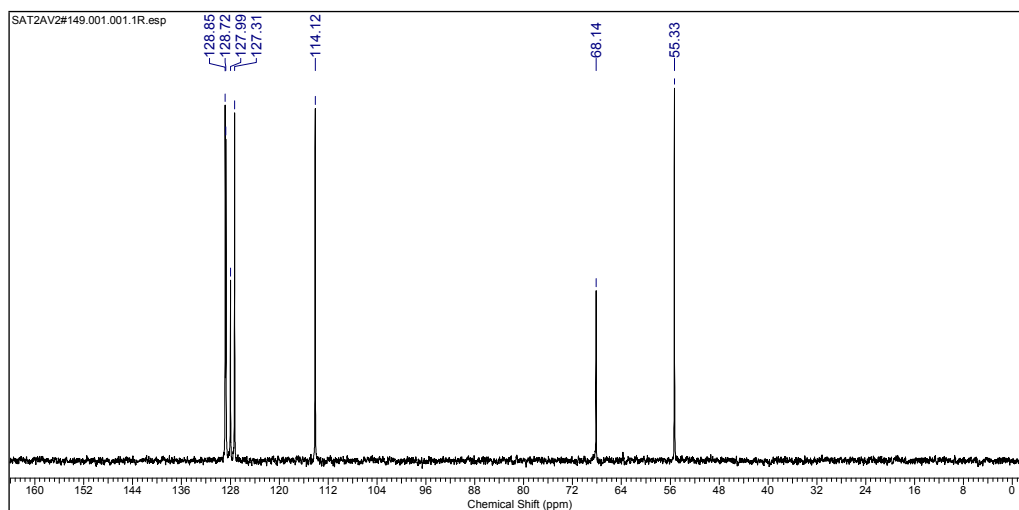

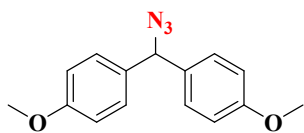

4,4'-(azidomethylene)bis(methoxybenzene), Table 3, Entry 12.

### <sup>1</sup>H NMR

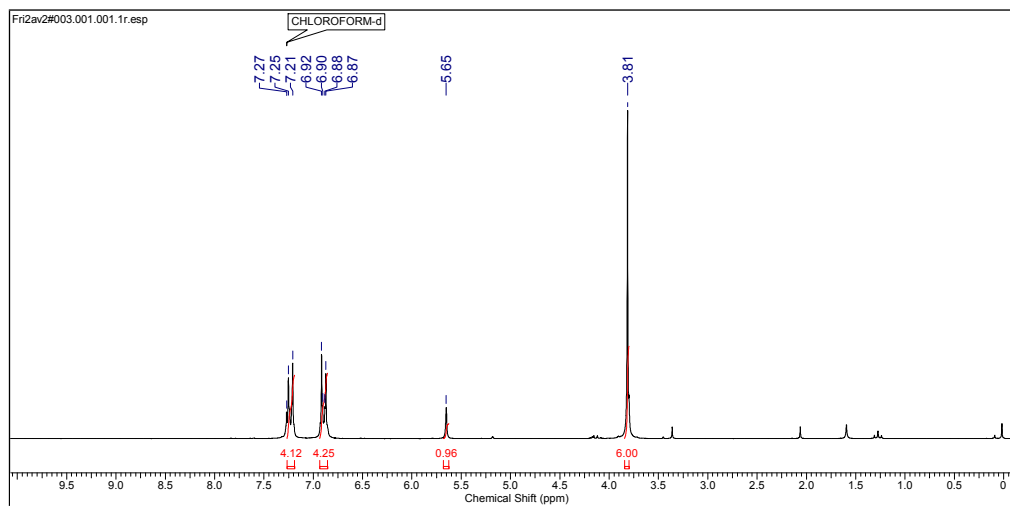

### <sup>13</sup>C NMR

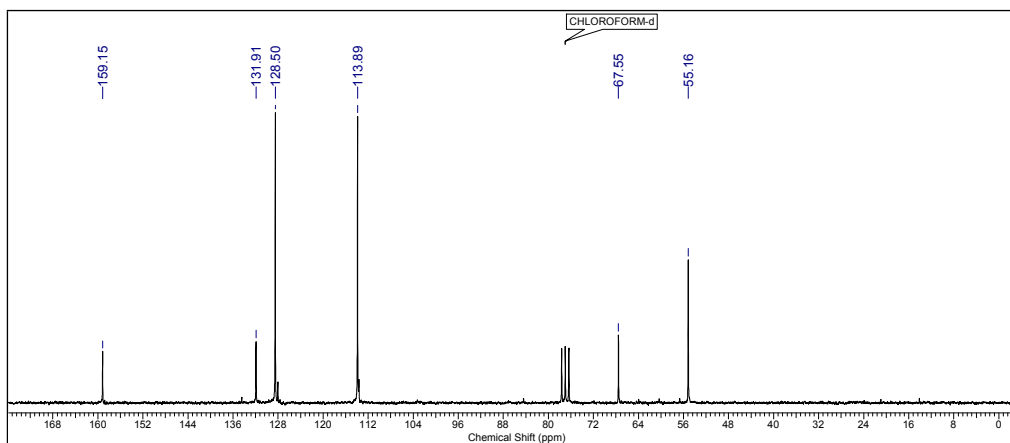

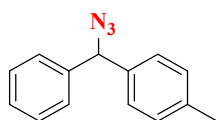

*1-(azido(phenyl)methyl)-4-methylbenzene*, Table 3, Entry 13.

### $^1\text{H}$ NMR

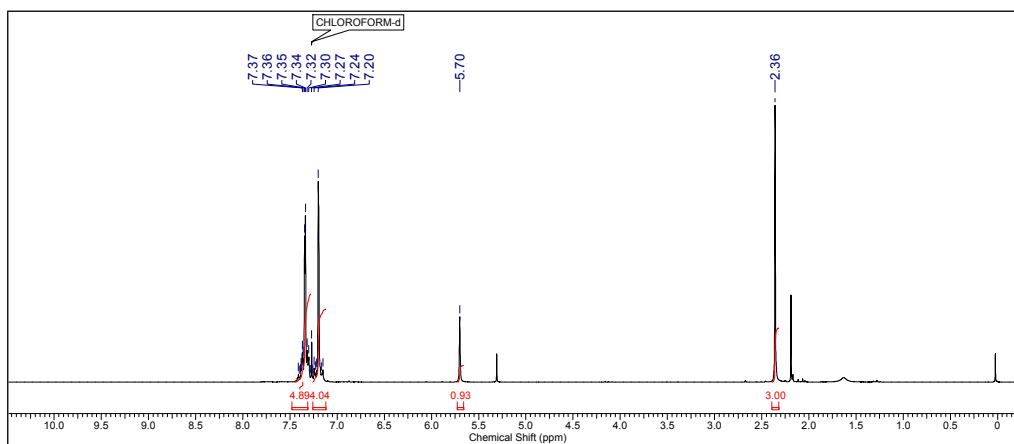

### $^{13}\text{C}$ NMR

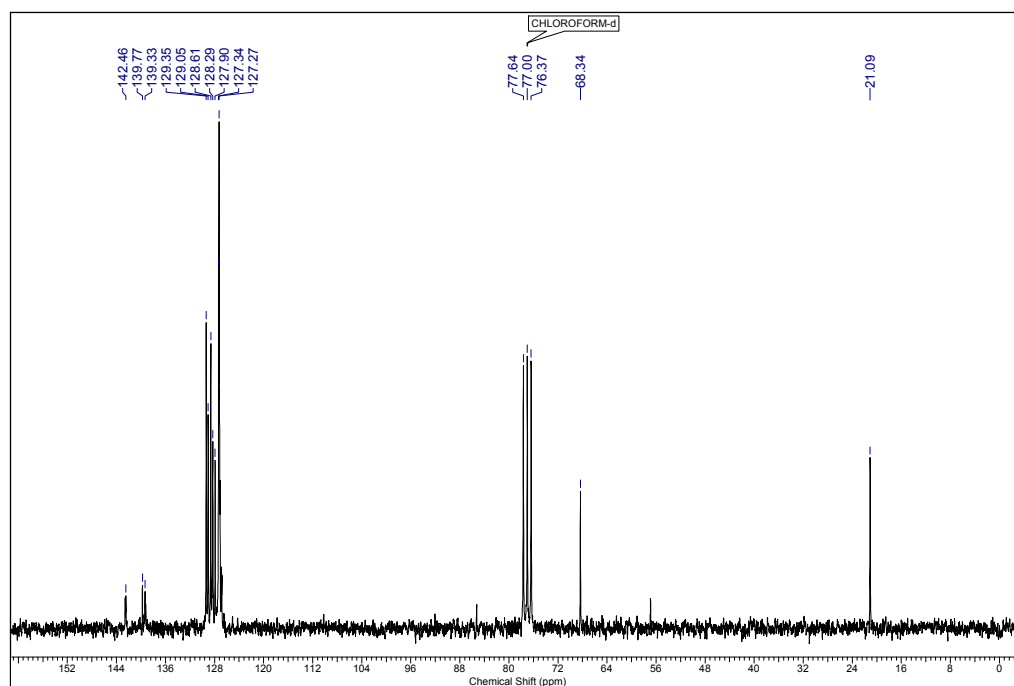

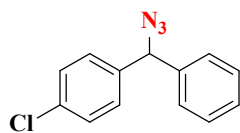

1-(azido(phenyl)methyl)-4-chlorobenzene, Table 3, Entry 14.

### <sup>1</sup>H NMR

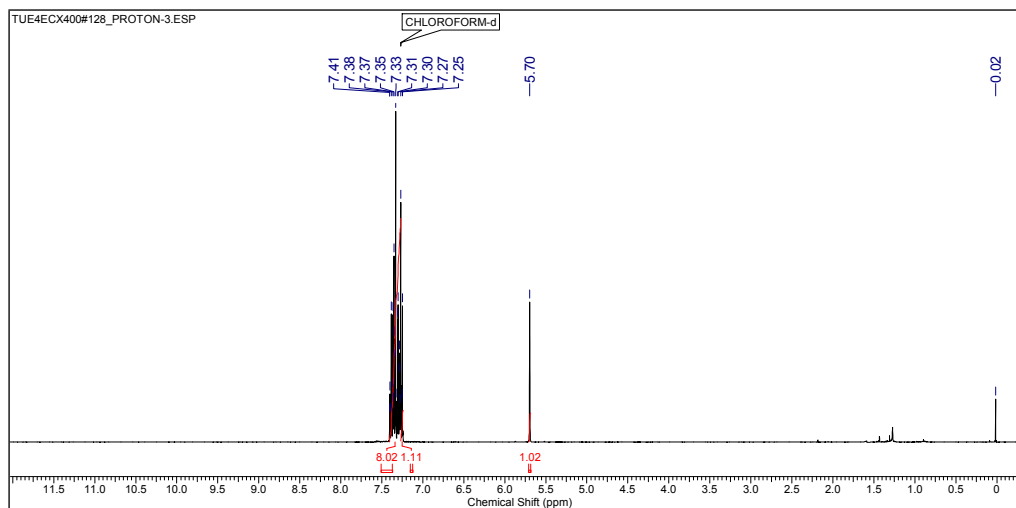

### <sup>13</sup>C NMR

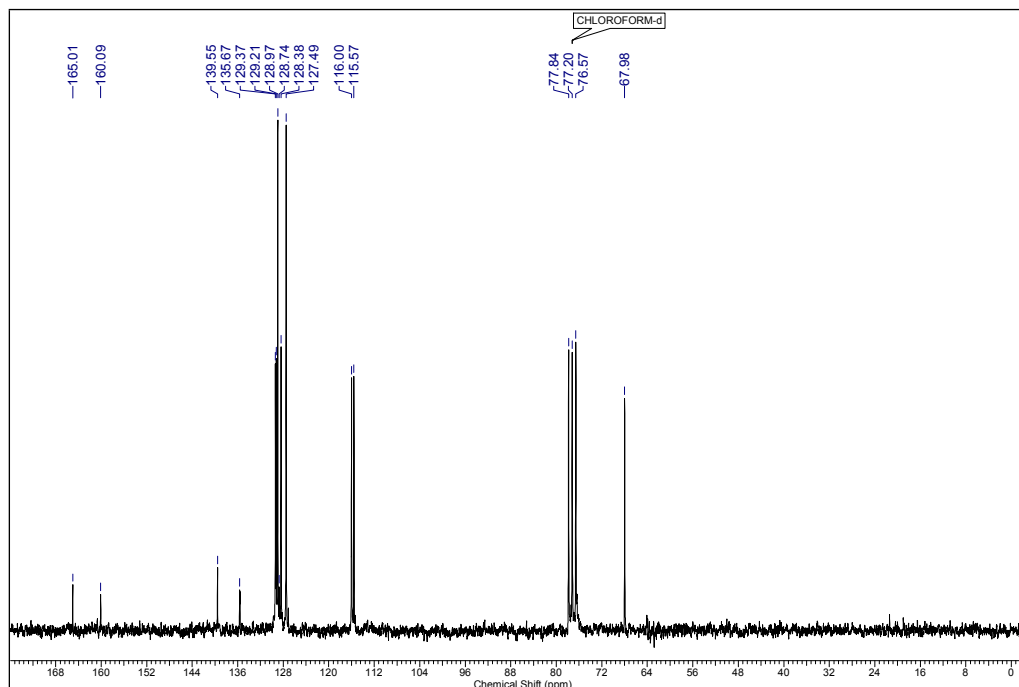

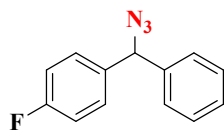

*1-(azido(phenyl)methyl)-4-fluorobenzene*, Table 3, Entry 15.

### <sup>1</sup>H NMR

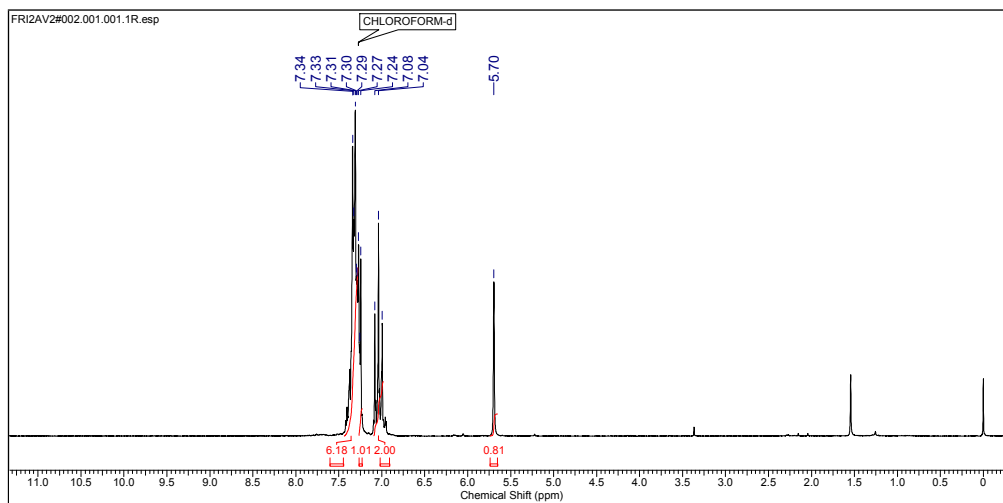

### <sup>13</sup>C NMR

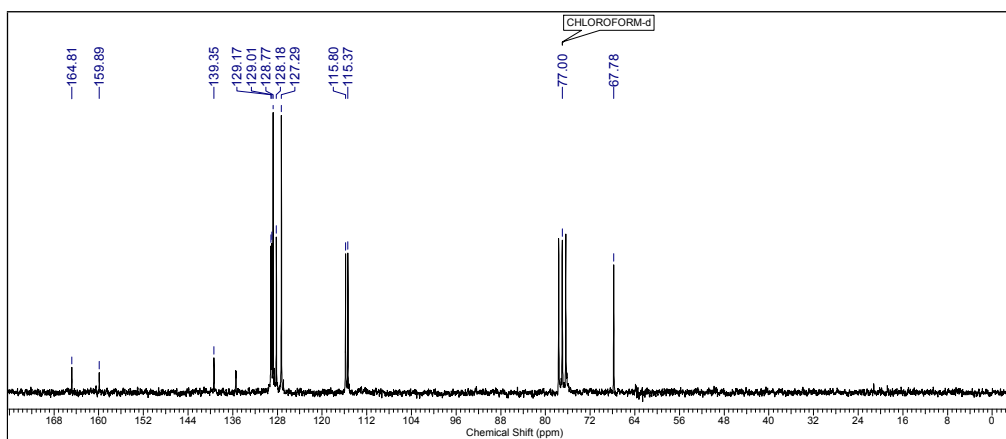

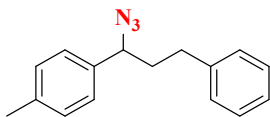

*1-(1-azido-3-phenylpropyl)-4-methylbenzene*, Table 3, Entry 16.

**<sup>1</sup>H NMR**

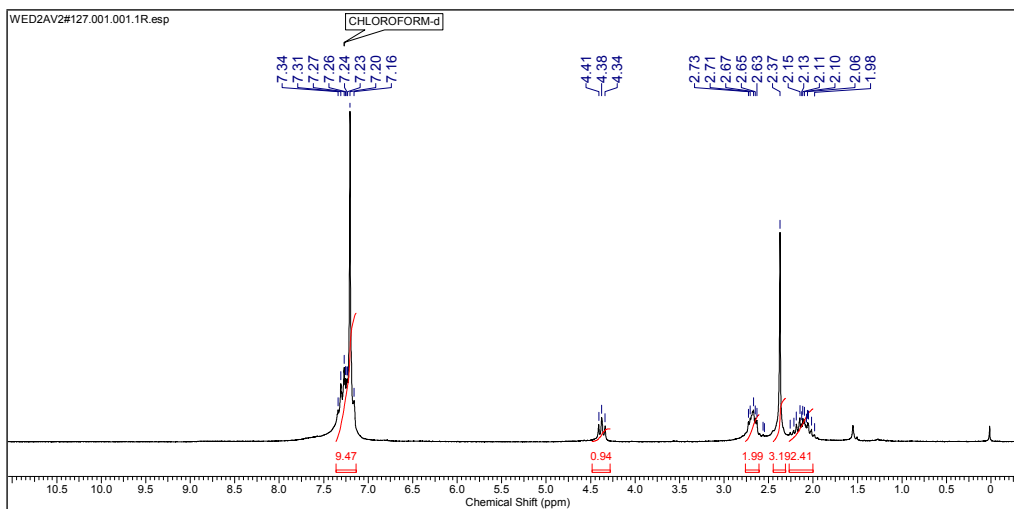

**<sup>13</sup>C NMR**

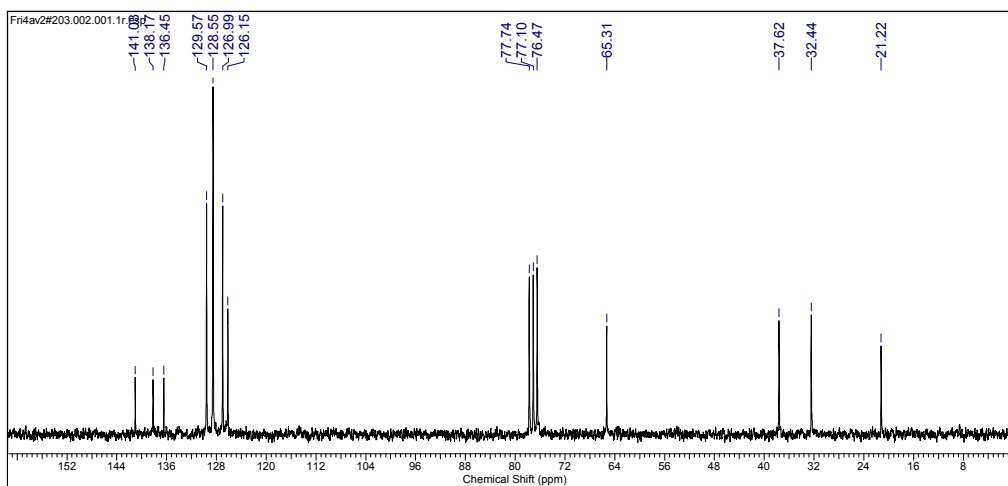

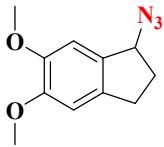

*1-azido-5,6-dimethoxy-2,3-dihydro-1H-indene*, Table 3, Entry 17.

**<sup>1</sup>H NMR**

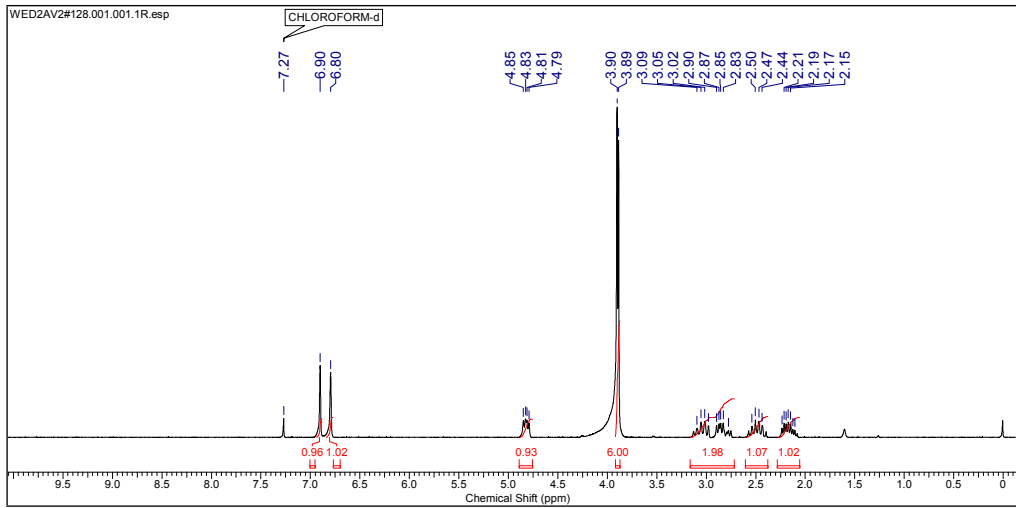

**<sup>13</sup>C NMR**

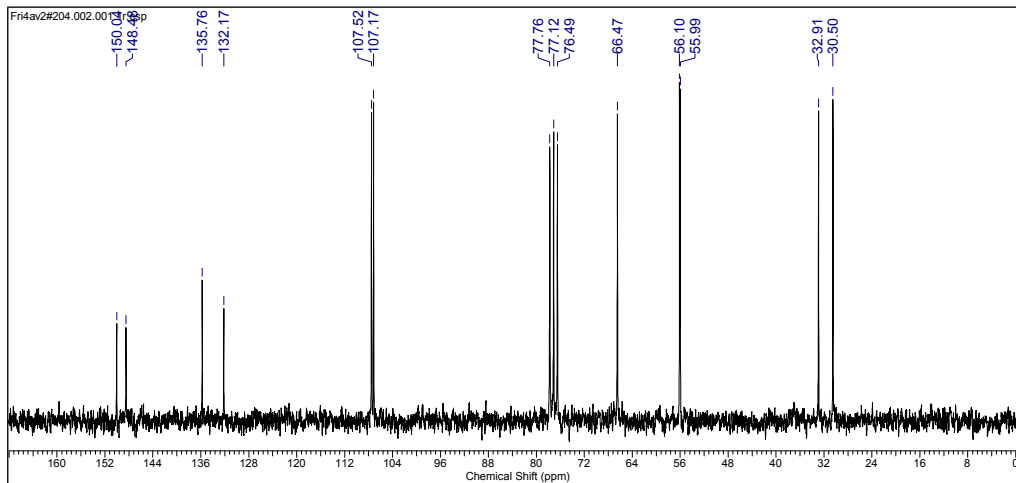



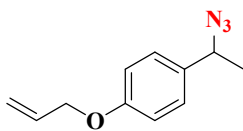

*1-(allyloxy)-4-(1-azidoethyl)benzene*, Table 3, Entry 18.

<sup>1</sup>H NMR

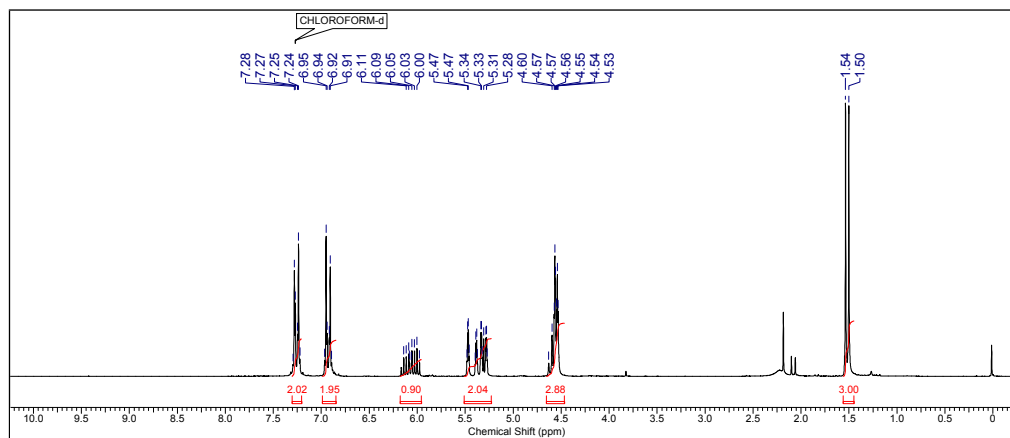

<sup>13</sup>C NMR

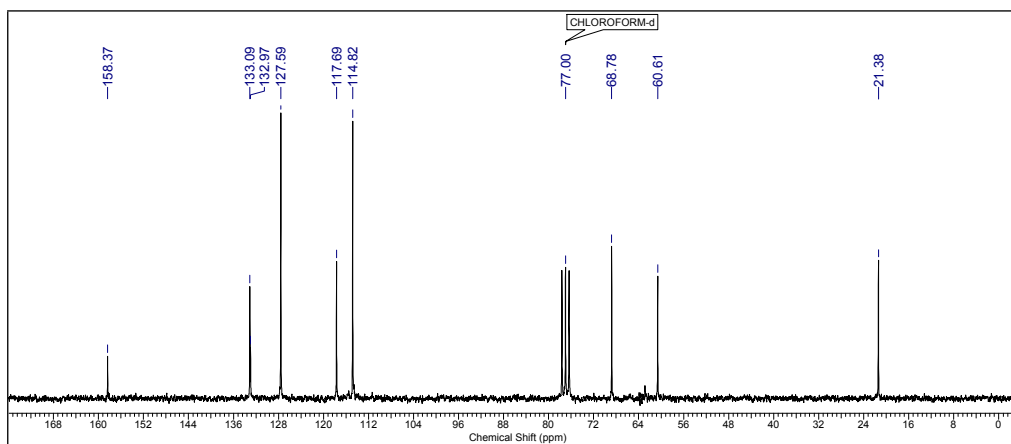

Supplement: c6nj02500e1.pdf [file c6nj02500e1.pdf]
